# Supplementary material for: Multimetallic assembly of concave-shaped rectangular Mn4 clusters as efficient hydrogen evolution electrocatalysts
Source: Royal Society of Chemistry journal article supplement (doi:10.1039/d5ta01854d), 2025-01-01
Supplement: d5ta01854d1.pdf [file d5ta01854d1.pdf]

## Supplementary Information

### Multimetallic assembly of concave-shaped rectangular $\text{Mn}_4$ clusters as efficient hydrogen evolution electrocatalysts

Chandan Sarkar,<sup>a</sup> Aditi De,<sup>b</sup> Arindam Gupta,<sup>c</sup> Ranjay K. Tiwari,<sup>d</sup> Tapan Sarkar,<sup>a</sup> J. N. Behera,<sup>d</sup> Sanjit Konar\*,<sup>c</sup> Subrata Kundu\*,<sup>b</sup> and Manindranath Bera\*<sup>a</sup>

<sup>a</sup>Department of Chemistry, University of Kalyani, Nadia, West Bengal-741235, INDIA.

<sup>b</sup>Process Engineering (EPE) Division, Central Electrochemical Research Institute, Karaikudi-630006, Tamil Nadu, INDIA, and Academy of Scientific and Innovative Research (AcSIR), Ghaziabad-201002, INDIA.

<sup>c</sup>Department of Chemistry, Indian Institute of Science Education and Research Bhopal, Bhopal By-pass road, Bhauri, Madhya Pradesh-462066, INDIA.

<sup>d</sup>School of Chemical Sciences, National Institute of Science Education & Research, An OCC of Homi Bhabha National Institute, Bhubaneswar, Khurda, Odisha-752050, INDIA.

#### Figures with Captions

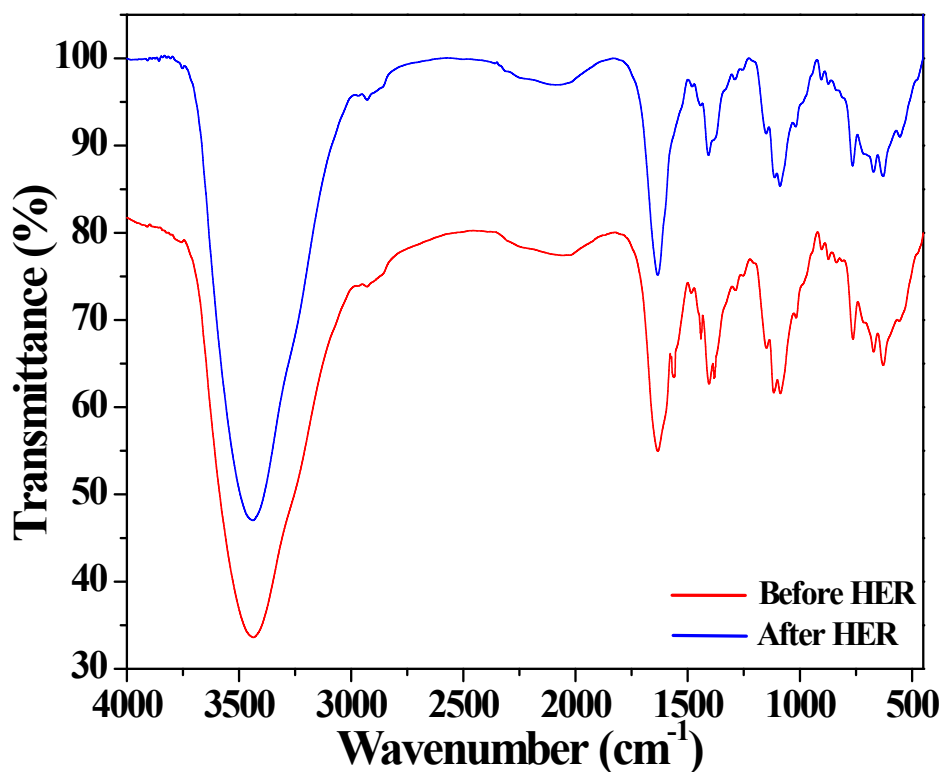

**Fig. S1.** FTIR spectra of **1** before (—) and after (—) HER studies in the region of 4000-450  $\text{cm}^{-1}$ .

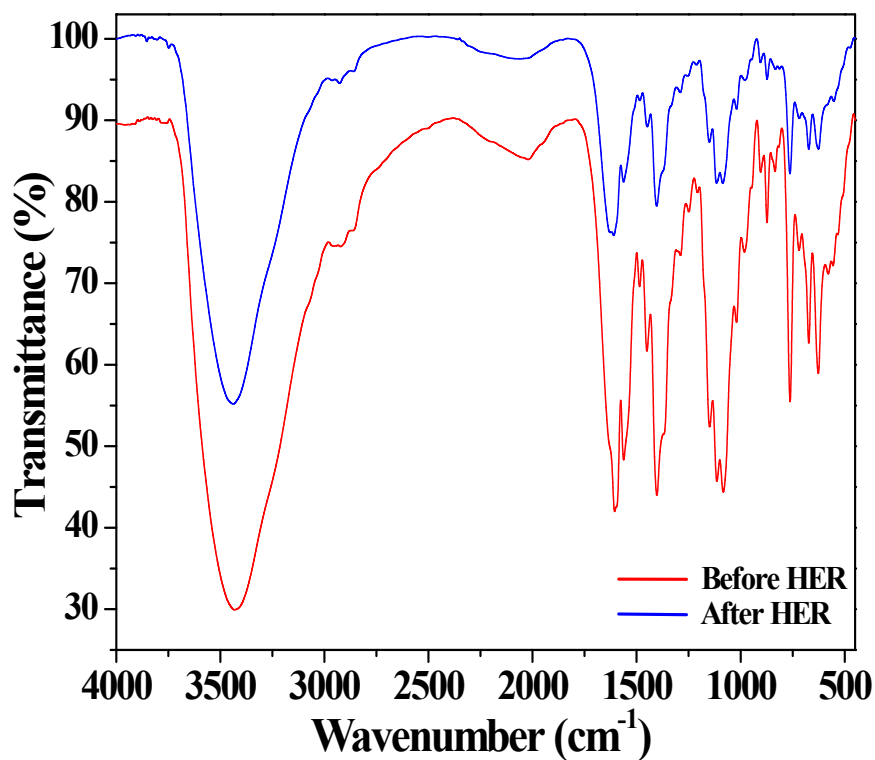

**Fig. S2.** FTIR spectra of **2** before (—) and after (—) HER studies in the region of 4000-450 cm<sup>-1</sup>.

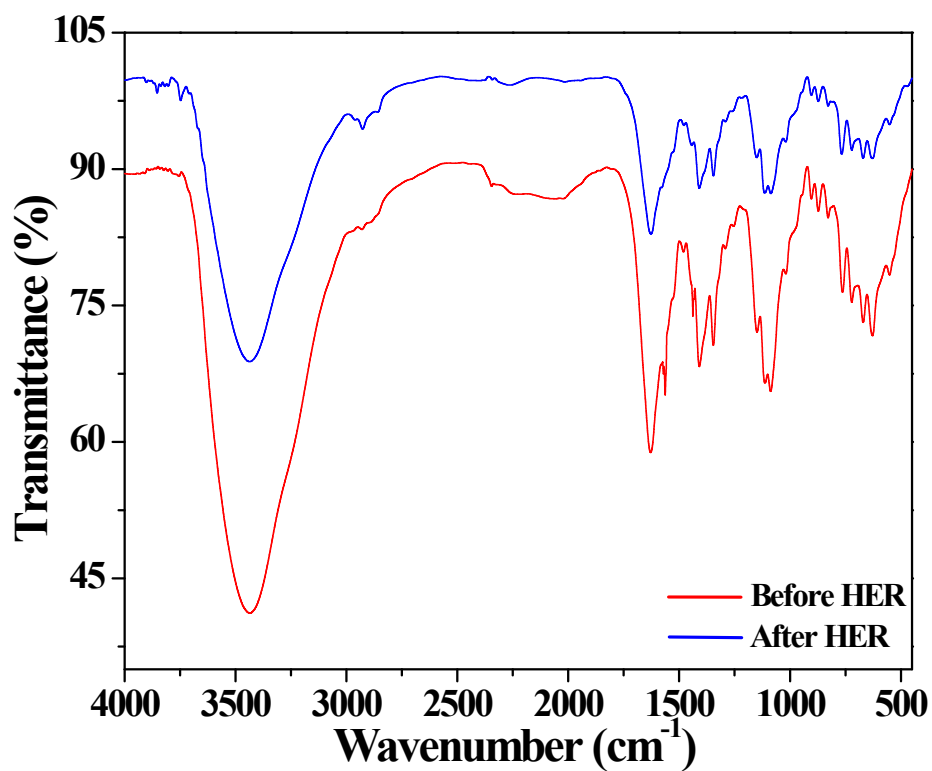

**Fig. S3.** FTIR spectra of **3** before (—) and after (—) HER studies in the region of 4000-450 cm<sup>-1</sup>.

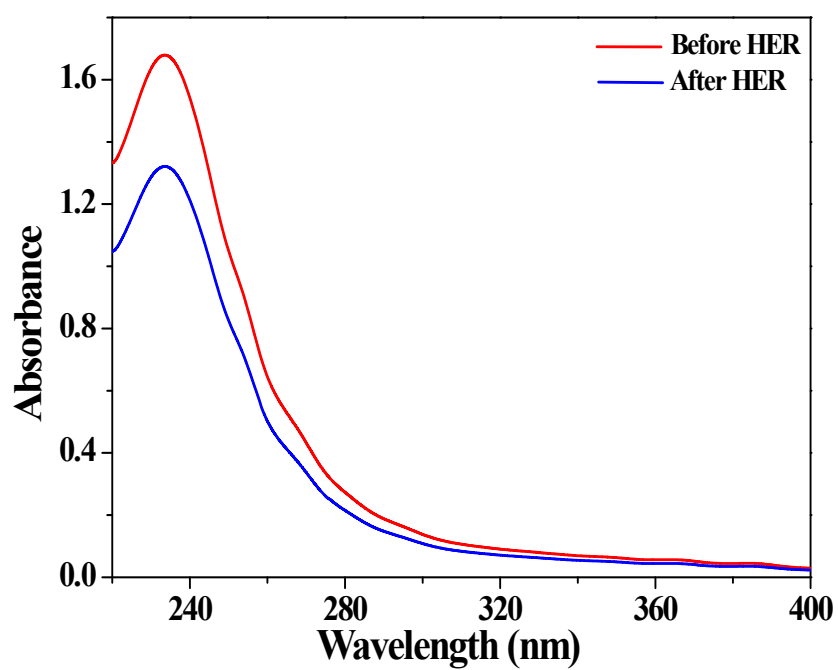

**Fig. S4.** UV-Vis spectra of **1** at  $10^{-4}$  (M) in MeOH before (—) and after (—) HER studies.

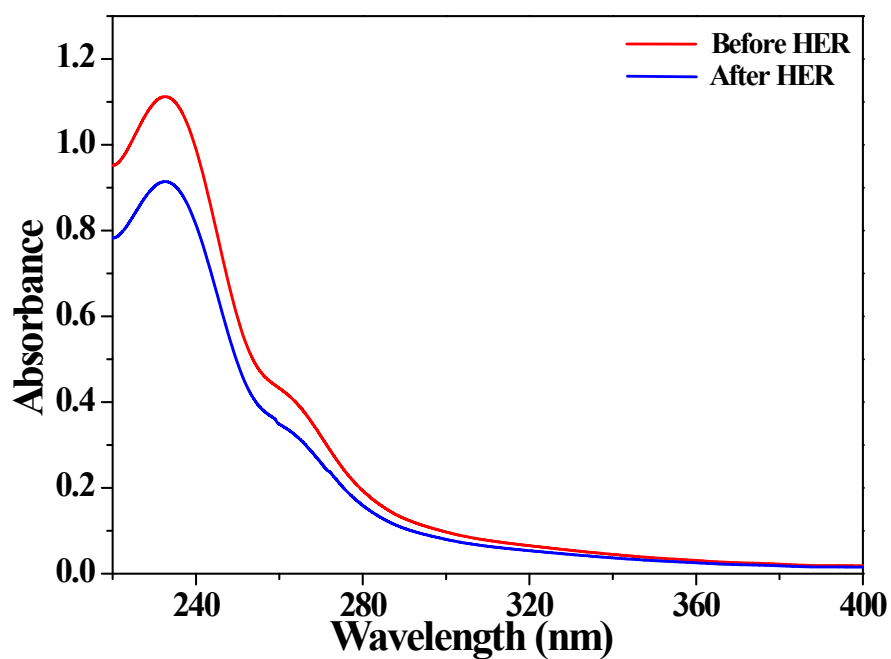

**Fig. S5.** UV-Vis spectra of **2** at  $10^{-4}$  (M) in MeOH before (—) and after (—) HER studies.

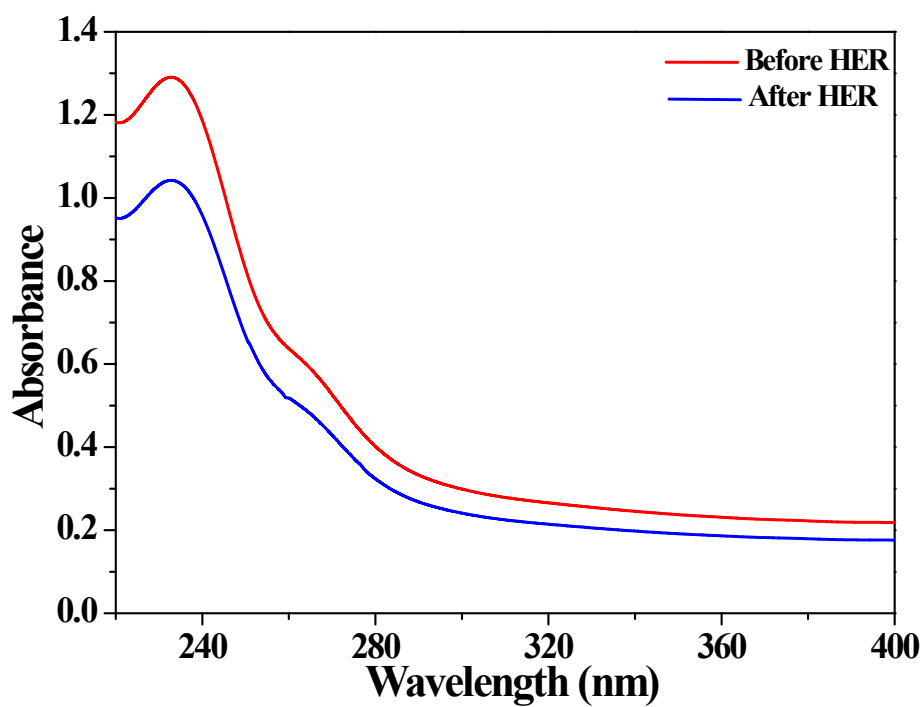

**Fig. S6.** UV-Vis spectra of **3** at  $10^{-4}$  (M) in MeOH before (—) and after (—) HER studies.

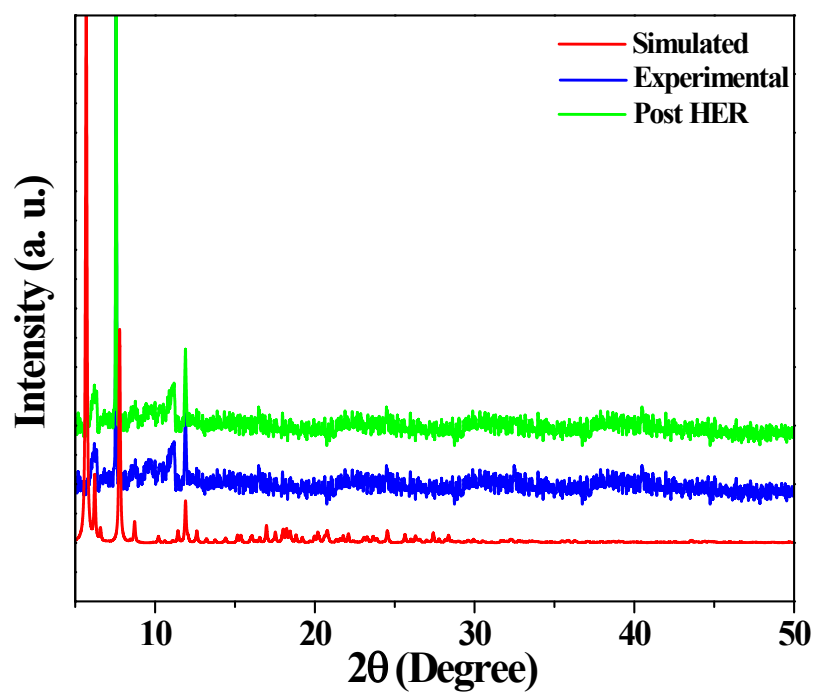

**Fig. S7.** Powder X-ray diffraction (PXRD) patterns of **1**: simulated PXRD (—), pre-HER experimental PXRD (—), and post-HER experimental PXRD (—).

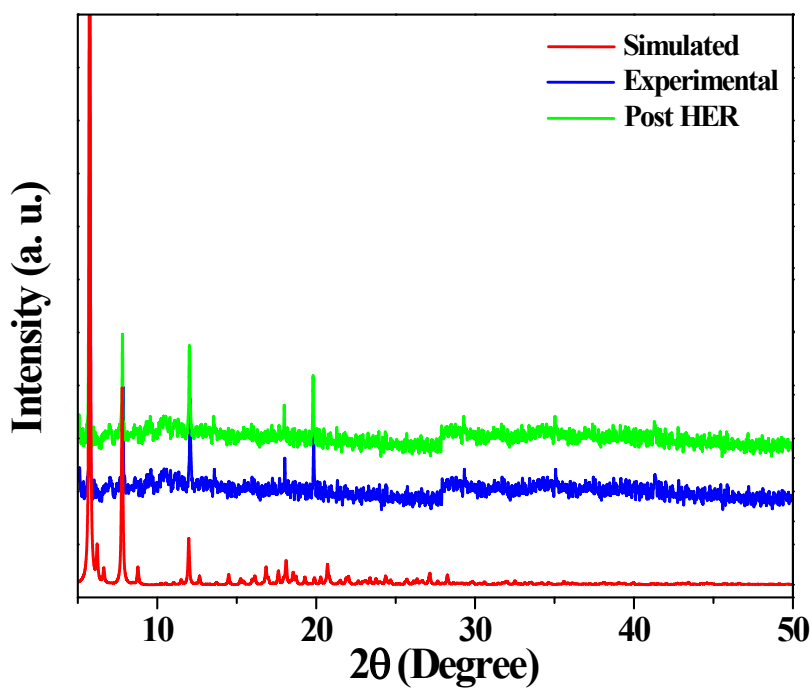

**Fig. S8.** Powder X-ray diffraction (PXRD) patterns of **2**: simulated PXRD (—), pre-HER experimental PXRD (—), and post-HER experimental PXRD (—).

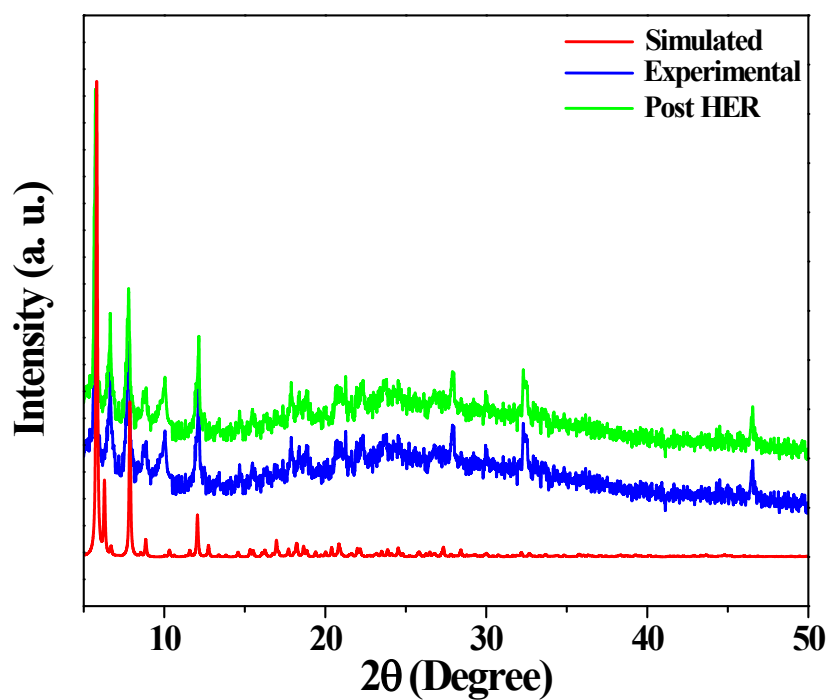

**Fig. S9.** Powder X-ray diffraction (PXRD) patterns of **3**: simulated PXRD (—), pre-HER experimental PXRD (—), and post-HER experimental PXRD (—).

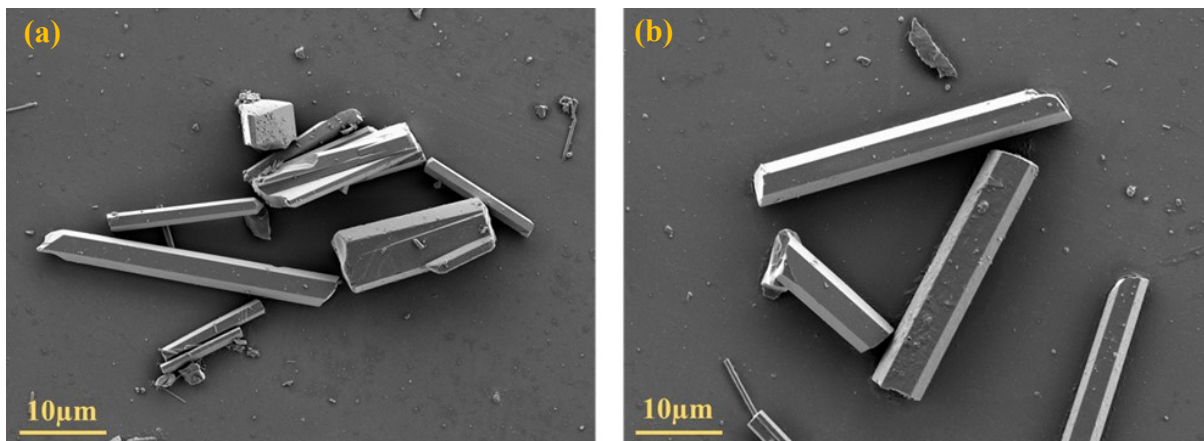

**Fig. S10.** Field emission scanning electron microscopic (FESEM) image of **1** (a) before and (b) after the HER studies.

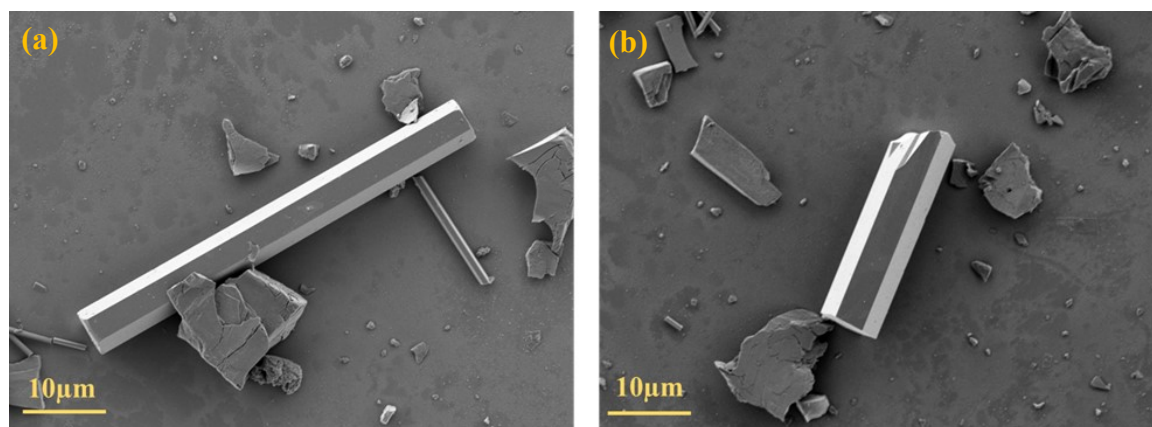

**Fig. S11.** Field emission scanning electron microscopic (FESEM) image of **2** (a) before and (b) after the HER studies.

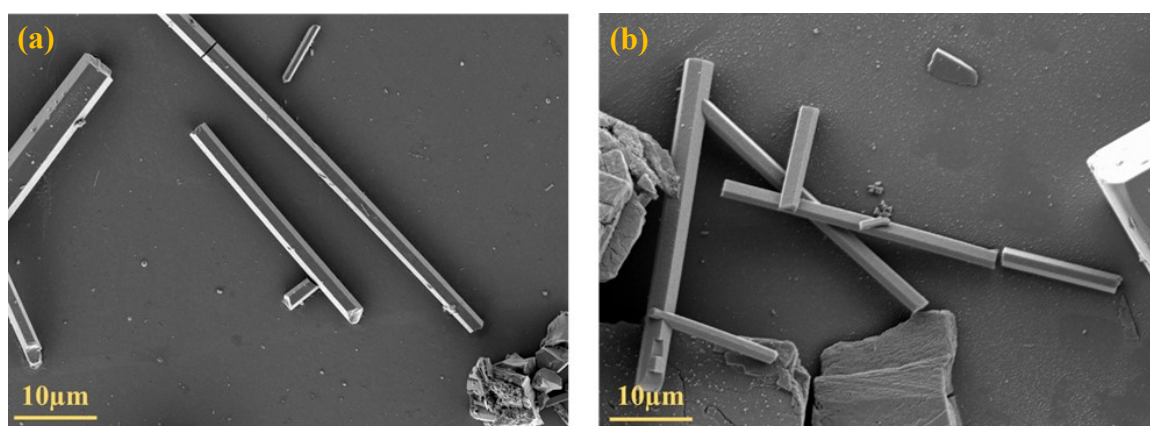

**Fig. S12.** Field emission scanning electron microscopic (FESEM) image of **3** (a) before and (b) after the HER studies.

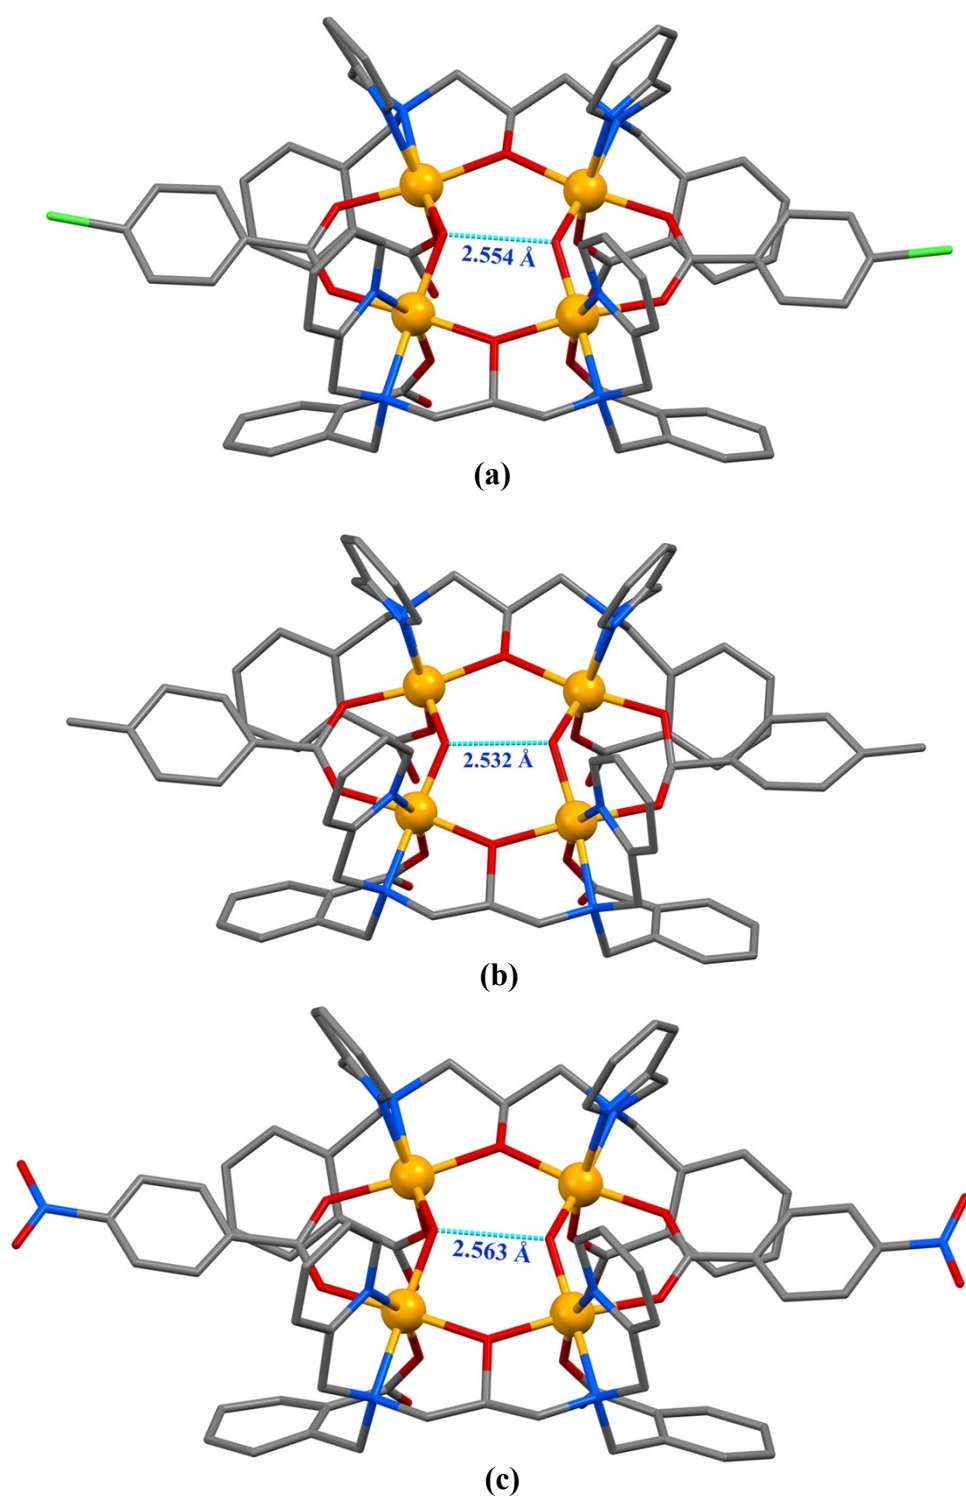

**Fig. S13.** Views of **1** (a), **2** (b) and **3** (c) showing intra-molecular H-bonds with interatomic distances of 2.554, 2.563 and 2.532 Å respectively, between the O2 and O3 atoms.

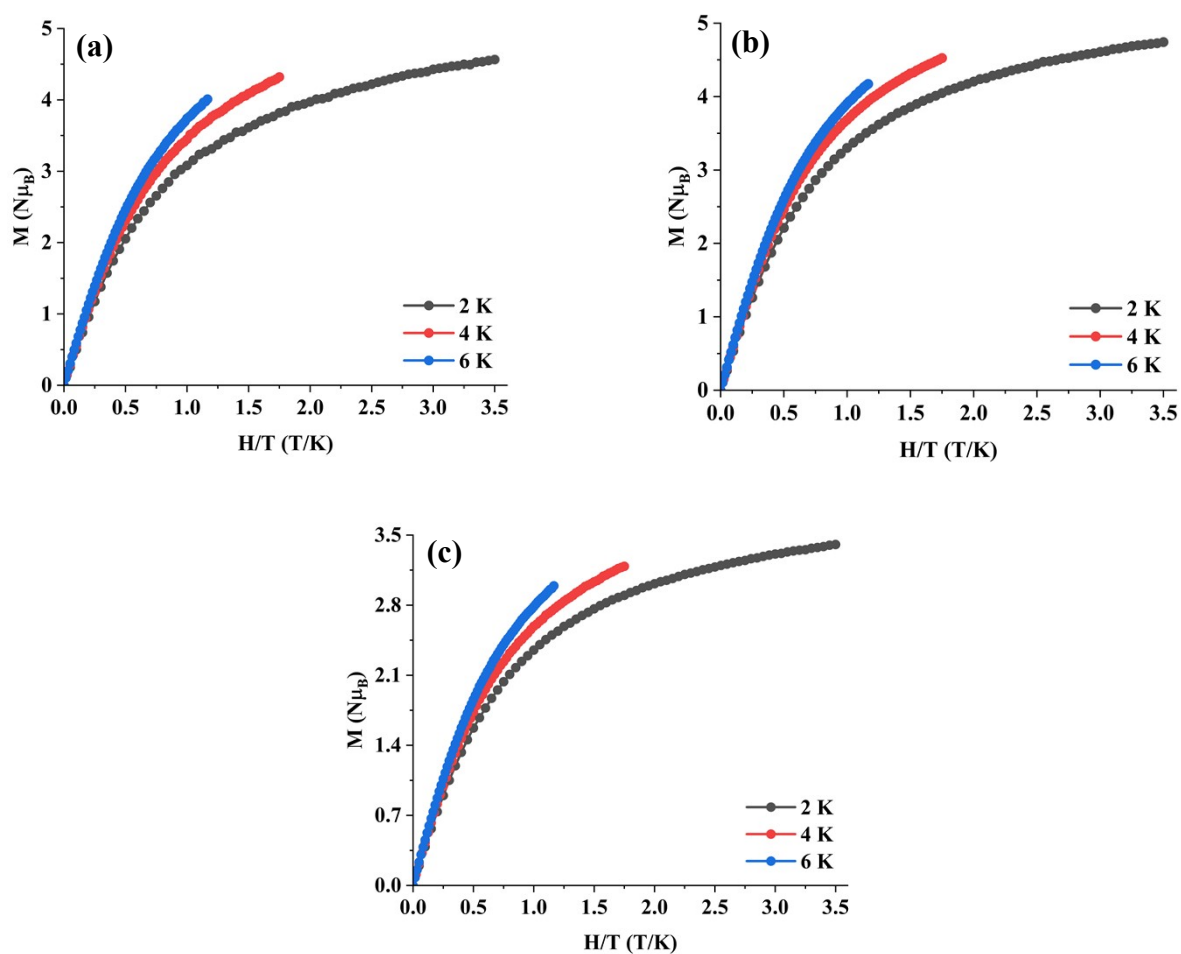

**Fig. S14.** Reduced magnetization data ( $M$  vs.  $H/T$ ) for (a) 1, (b) 2 and (c) 3 collected under varying applied dc field.

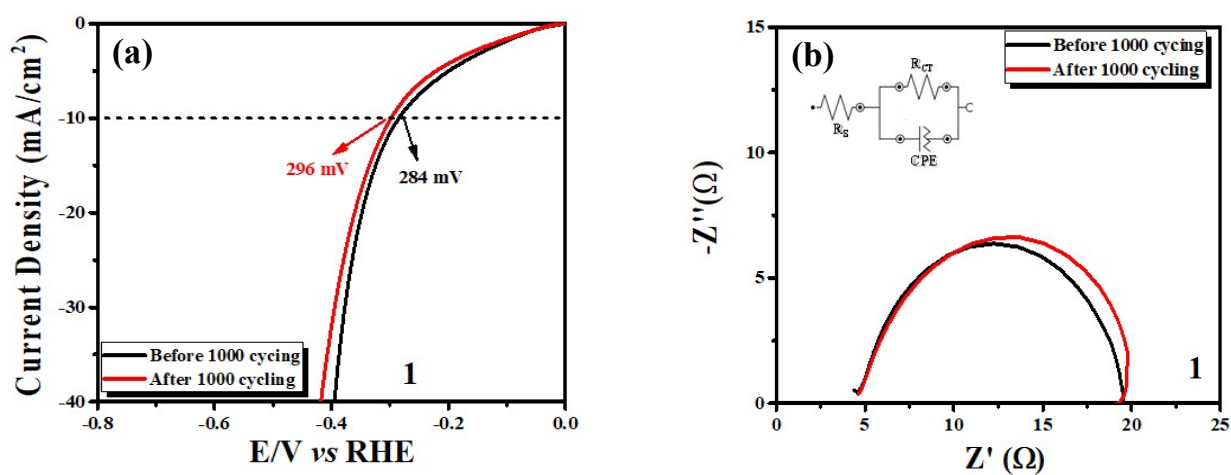

**Fig. S15.** (a) LSV outcomes and (b) EIS results of 1 before and after HER AD studies, respectively.



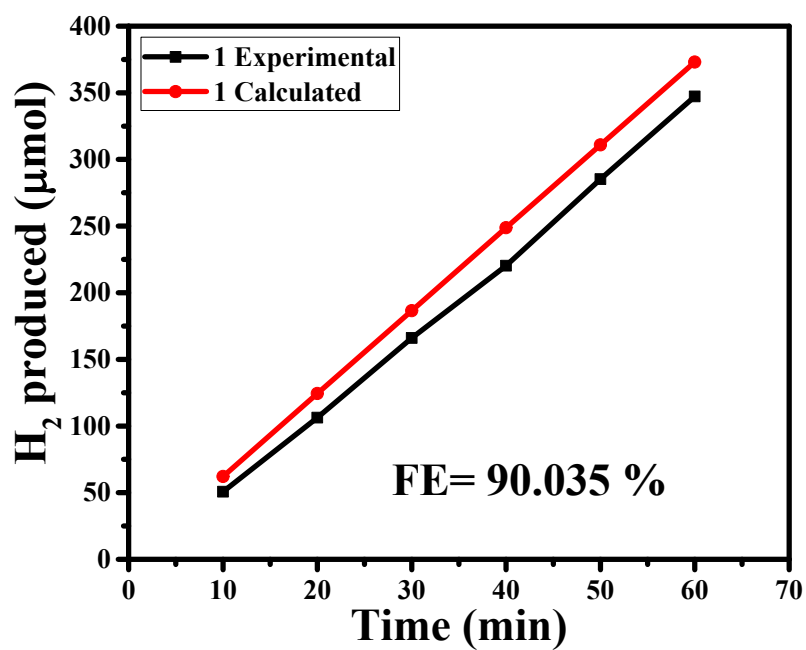

**Fig. S16.** Representative plot for Faradic efficiency of catalyst 1.

### Scheme with Caption

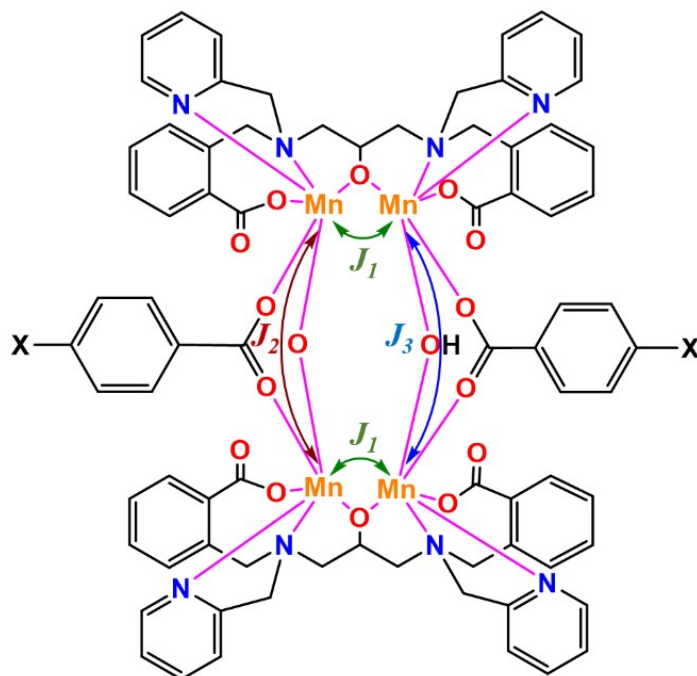

**Scheme S1.** A schematic diagram showing the pathways for magnetic exchange interactions in 1-3.

## Tables with Captions

**Table S1.** Selected bond distances (Å) and angles (deg) in **2**.

| Bond distances (Å) |           |                 |           |
|--------------------|-----------|-----------------|-----------|
| Mn(1)-O(1)         | 2.020(12) | Mn(2)-O(1)      | 2.076(12) |
| Mn(1)-O(2)         | 1.812(7)  | Mn(2)-O(3)      | 1.951(10) |
| Mn(1)-O(4)         | 2.136(15) | Mn(2)-O(6)      | 2.155(16) |
| Mn(1)-O(8)         | 1.945(13) | Mn(2)-O(9)      | 1.976(15) |
| Mn(1)-N(1)         | 2.120(16) | Mn(2)-N(3)      | 2.215(16) |
| Mn(1)-N(2)         | 2.206(18) | Mn(2)-N(4)      | 2.270(2)  |
| Bond angles (deg)  |           |                 |           |
| O(1)-Mn(1)-O(2)    | 93.6(6)   | O(1)-Mn(2)-O(3) | 90.2(6)   |
| O(1)-Mn(1)-O(4)    | 89.9(5)   | O(1)-Mn(2)-O(6) | 88.4(5)   |
| O(1)-Mn(1)-O(8)    | 172.2(6)  | O(1)-Mn(2)-O(9) | 172.2(6)  |
| O(1)-Mn(1)-N(1)    | 83.0(6)   | O(1)-Mn(2)-N(3) | 82.0(5)   |
| O(1)-Mn(1)-N(2)    | 91.7(6)   | O(1)-Mn(2)-N(4) | 95.4(6)   |
| O(2)-Mn(1)-O(4)    | 98.6(7)   | O(3)-Mn(2)-O(6) | 104.4(6)  |
| O(2)-Mn(1)-O(8)    | 93.7(7)   | O(3)-Mn(2)-O(9) | 94.7(7)   |
| O(2)-Mn(1)-N(1)    | 171.7(7)  | O(3)-Mn(2)-N(3) | 165.1(7)  |
| O(2)-Mn(1)-N(2)    | 98.9(8)   | O(3)-Mn(2)-N(4) | 92.8(7)   |
| O(4)-Mn(1)-O(8)    | 91.9(6)   | O(6)-Mn(2)-O(9) | 96.2(7)   |
| O(4)-Mn(1)-N(1)    | 89.0(6)   | O(6)-Mn(2)-N(3) | 88.1(6)   |
| O(4)-Mn(1)-N(2)    | 162.3(6)  | O(6)-Mn(2)-N(4) | 162.4(7)  |
| O(8)-Mn(1)-N(1)    | 89.4(6)   | O(9)-Mn(2)-N(3) | 91.8(6)   |
| O(8)-Mn(1)-N(2)    | 84.3(6)   | O(9)-Mn(2)-N(4) | 78.4(7)   |
| N(1)-Mn(1)-N(2)    | 73.7(7)   | N(3)-Mn(2)-N(4) | 75.5(7)   |

**Table S2.** Selected bond distances (Å) and angles (deg) in **3**.

| Bond distances (Å) |          |                  |           |
|--------------------|----------|------------------|-----------|
| Mn(1)-O(1)         | 2.004(5) | Mn(2)-O(1)       | 2.062(4)  |
| Mn(1)-O(2)         | 1.818(3) | Mn(2)-O(3)       | 1.937(3)  |
| Mn(1)-O(4)         | 2.133(5) | Mn(2)-O(6)       | 2.154(6)  |
| Mn(1)-O(8)         | 2.000(5) | Mn(2)-O(10)      | 1.973(7)  |
| Mn(1)-N(1)         | 2.134(6) | Mn(2)-N(3)       | 2.210(6)  |
| Mn(1)-N(2)         | 2.255(6) | Mn(2)-N(4)       | 2.290(8)  |
| Bond angles (deg)  |          |                  |           |
| O(1)-Mn(1)-O(2)    | 93.8(2)  | O(1)-Mn(2)-O(3)  | 91.4(2)   |
| O(1)-Mn(1)-O(4)    | 98.7(2)  | O(1)-Mn(2)-O(6)  | 88.55(18) |
| O(1)-Mn(1)-O(8)    | 172.6(2) | O(1)-Mn(2)-O(10) | 176.2(4)  |
| O(1)-Mn(1)-N(1)    | 83.5(2)  | O(1)-Mn(2)-N(3)  | 83.2(2)   |
| O(1)-Mn(1)-N(2)    | 92.6(2)  | O(1)-Mn(2)-N(4)  | 94.9(3)   |
| O(2)-Mn(1)-O(4)    | 98.7(2)  | O(3)-Mn(2)-O(6)  | 103.8(2)  |
| O(2)-Mn(1)-O(8)    | 93.4(2)  | O(3)-Mn(2)-O(10) | 91.3(3)   |
| O(2)-Mn(1)-N(1)    | 171.6(3) | O(3)-Mn(2)-N(3)  | 165.8(2)  |
| O(2)-Mn(1)-N(2)    | 98.2(3)  | O(3)-Mn(2)-N(4)  | 94.9(2)   |
| O(4)-Mn(1)-O(8)    | 91.7(2)  | O(6)-Mn(2)-O(10) | 93.4(4)   |
| O(4)-Mn(1)-N(1)    | 89.3(2)  | O(6)-Mn(2)-N(3)  | 89.24(19) |
| O(4)-Mn(1)-N(2)    | 163.0(2) | O(6)-Mn(2)-N(4)  | 161.0(2)  |
| O(8)-Mn(1)-N(1)    | 89.1(2)  | O(10)-Mn(2)-N(3) | 93.6(3)   |
| O(8)-Mn(1)-N(2)    | 85.0(2)  | O(10)-Mn(2)-N(4) | 82.2(5)   |
| N(1)-Mn(1)-N(2)    | 74.0(2)  | N(3)-Mn(2)-N(4)  | 72.7(2)   |

**Table S3.** Values of magnetic coupling constant, Landé g-factor and zero-field splitting parameters of **1-3**.

| Complex  | $g_x = g_y$ | $g_z$ | $2J_1$ | $2J_2$ | $2J_3$ | $D$   |
|----------|-------------|-------|--------|--------|--------|-------|
| <b>1</b> | 2.17        | 2.56  | -11.38 | -13.41 | +5.92  | -0.47 |
| <b>2</b> | 2.33        | 1.91  | -7.98  | -11.92 | +4.44  | -0.42 |

|   |      |      |        |       |       |       |
|---|------|------|--------|-------|-------|-------|
| 3 | 2.11 | 2.43 | -10.04 | -9.40 | +7.64 | -1.43 |
|---|------|------|--------|-------|-------|-------|

### **Calculation for the Cost of the Synthesized Electrocatalysts (1-3) and the Price of the Generated Hydrogen**

To gain idea about the cost of the synthesized electrocatalysts (1-3), we need to know the materials used for their synthesis. Thus, a list of materials used and their cost are given below:

| Sl. No. | Description                     | Specification | Amount (Rs.) |
|---------|---------------------------------|---------------|--------------|
| 1.      | 1,3-Diamino-2-propanol          | 25 g          | 7140.00      |
| 2.      | 2-Carboxybenzaldehyde           | 100 g         | 12004.93     |
| 3.      | 2-Picolylchloride hydrochloride | 25 g          | 9,768.00     |
| 4.      | Sodium borohydride              | 100 g         | 2460.00      |
| 5.      | Manganese carbonate             | 500 g         | 338.00       |
| 6.      | Sodium hydroxide                | 500 g         | 566.00       |
| 7.      | <i>Para</i> -chlorobenzoic acid | 25 g          | 2700.00      |
| 8.      | <i>Para</i> -methylbenzoic acid | 25 g          | 1800.00      |
| 9.      | <i>Para</i> -nitrobenzoic acid  | 25 g          | 1700.00      |
| 10.     | Perchloric acid                 | 500 mL        | 1044.00      |
| 11.     | Hydrochloric acid               | 2.5 L         | 1310.00      |
| 12.     | Hydrobromic acid                | 500 mL        | 800.00       |
| 13.     | Lithium hydroxide               | 100 g         | 3278.00      |
| 14.     | Methanol                        | 2.5 L         | 555.00       |
| 15.     | Diethyl ether                   | 2.5 L         | 3021.00      |

#### **Synthesis of the Multifunctional Organic Scaffold (H<sub>3</sub>L):**

4.643 g 2-carboxybenzaldehyde + 1.1424 g 1,3-diamino-2-propanol = 4.95 g precursor organic scaffold (87%).

1.790 g precursor organic scaffold + 1.640 g 2-picolylchloride hydrochloride = 2.00 g final organic scaffold.

NaOH used: 1.20 g, LiOH used: 1.10 g, NaBH<sub>4</sub> used: 1.50 g, methanol used: ~ 30 mL, HCl used: ~ 5 mL, HBr used: ~ 2 mL.

### Synthesis of Mn<sub>4</sub> Catalysts:

Multifunctional organic scaffold used: 250 mg, metal salts used: 333 mg, NaOH used: 42 mg, methanol used: ~ 20 mL, diethyl ether used: ~ 50 mL.

Catalyst **1**: Yield: 0.341 g (75%): *para*-chlorobenzoic acid used: 72 mg.

Catalyst **2**: Yield: 0.321 g (73%): *para*-methylbenzoic acid used: 63 mg.

Catalyst **3**: Yield: 0.321 g (73%): *para*-nitrobenzoic acid used: 78 mg.

**Now, the calculation for the cost of the synthesized catalysts is given below:**

Synthesis of the Multifunctional Organic Scaffold (H<sub>3</sub>L):

- **2-Carboxybenzaldehyde used:** 4.643 g  
Cost =  $(4.643/100) \times 12004.93 = \text{Rs.}557.19$
- **1,3-Diamino-2-propanol used:** 1.1424 g  
Cost =  $(1.1424/25) \times 7140.00 = \text{Rs.}326.31$
- **2-Picolylchloride hydrochloride used:** 1.640 g  
Cost =  $(1.640/25) \times 9768.00 = \text{Rs.}640.99$
- **Sodium hydroxide (NaOH) used:** 1.20 g  
Cost =  $(1.20/500) \times 566.00 = \text{Rs.}1.36$
- **Lithium hydroxide (LiOH) used:** 1.10 g  
Cost =  $(1.10/100) \times 3278.00 = \text{Rs.}36.06$
- **Sodium borohydride (NaBH<sub>4</sub>) used:** 1.50 g  
Cost =  $(1.50/100) \times 2460.00 = \text{Rs.}36.90$
- **Methanol used:** 30 mL  
Cost =  $(30/2500) \times 555.00 = \text{Rs.}6.66$
- **Hydrochloric acid (HCl) used:** 5 mL  
Cost =  $(5/2500) \times 1310.00 = \text{Rs.}2.62$
- **Hydrobromic acid (HBr) used:** 2 mL  
Cost =  $(2/500) \times 800.00 = \text{Rs.}3.20$
- **Total Cost of H<sub>3</sub>L = Rs.1611.29**

Synthesis of the Electrocatalysts (**1-3**):

For each electrocatalyst,

- **H<sub>3</sub>L used:** 250 mg  
Cost =  $(250/2000) \times \text{Rs.}1611.29 = \text{Rs.} 201.41$
- **Metal salt used:** 333 mg  
Cost = Rs. 50.00 (approx.)
- **NaOH used:** 42 mg  
Cost =  $(42/500) \times 566.00 = \text{Rs.}0.048$
- **Methanol used:** 20 mL  
Cost =  $(20/2500) \times 555.00 = \text{Rs.}4.44$
- **Diethyl ether used:** 50 mL  
Cost =  $(50/2500) \times 3021.00 = \text{Rs.}60.42$
- **Benzoic acid derivatives:**
  - **Para-chlorobenzoic acid used for catalyst 1:** 72 mg  
Cost =  $(72/25000) \times 2700.00 = \text{Rs.}7.78$
  - **Para-methylbenzoic acid used for catalyst 2:** 63 mg  
Cost =  $(63/25000) \times 1800.00 = \text{Rs.}4.54$
  - **Para-nitrobenzoic acid used for catalyst 3:** 78 mg  
Cost =  $(78/25000) \times 1700.00 = \text{Rs.}5.30$

For **catalyst 1**, the total cost: Rs. 324.10

For **catalyst 2**, the total cost: Rs. 320.86

For **catalyst 3**, the total cost: Rs. 321.62

#### **Cost of the Synthesized Electrocatalysts:**

The average cost per gram of synthesized electrocatalyst: Rs.987.42

The average cost per 50 mg of the synthesized electrocatalyst =  $(50/1000) \times 987.42 = \text{Rs.}49.37$

Additionally, the **carbon cloth** costs at Rs.10,000 per square meter contributes as follows for  $4.5 \times 1 \text{ cm}^2 = (0.045 \text{ m}^2) \times \text{Rs.} 10,000 = \text{Rs.} 45.00$

Here, only the cost of materials used has been discussed, and accordingly, all the calculations are being carried out. But actually, the instruments used for all the characterizations, synthetic processes, experimental works, electrodes, electricity, and operational cost should be considered for a full economic evaluation.

#### **Price of the Generated Hydrogen:**

To get an idea of the price of generated hydrogen Faradic efficiency was measured for the best active catalyst **1** using GC, and we have compared the calculated amount of H<sub>2</sub> (from the

Faraday's law) and experimentally obtained H<sub>2</sub> at 20 mA/cm<sup>2</sup> current density (Fig. S16, Supplementary Information). The calculated Faradic efficiency value at the same current density is 90.035 % for catalyst 1.

Now, Using Faradaic efficiency = 90.035% at 20 mA/cm<sup>2</sup> current density:

- **Charge Passed (Q):**

$$Q = It = (20 \times 10^{-3} \text{ A}) \times (3600 \text{ s}) = 72 \text{ C}$$

- **Moles of Hydrogen (H<sub>2</sub>) Produced:**

$$n = Q \times \text{Faradaic efficiency} / 2F = 72 \times 0.90035 / 2 \times 96485 = 3.36 \times 10^{-4} \text{ moles}$$

- **Mass of H<sub>2</sub> Produced:**  $m = n \times M = (3.36 \times 10^{-4}) \times 2.016 = 6.78 \times 10^{-4} \text{ g}$

- **Volume of H<sub>2</sub> Produced:**  $V = n \times 22.414 = (3.36 \times 10^{-4}) \times 22.414 = 7.53 \text{ mL}$

#### **Cost Estimation for Hydrogen Production:**

- **Catalyst cost used (1 mg in electrode)**

$$\text{Cost} = \text{Rs. } 49.37 / 50 \times 1 = \text{Rs. } 0.987$$

- **Carbon cloth cost for 1 × 1 cm<sup>2</sup>**

$$\text{Cost} = \text{Rs. } 10000 / 10000 \times 1 = \text{Rs. } 1.00$$

#### **Total Cost for Hydrogen Production (1 cm<sup>2</sup> coated electrode)**

$$\text{Total cost} = \text{Rs. } 0.987 + \text{Rs. } 1.00 = \text{Rs. } 1.987$$

#### **Hydrogen cost per Gram**

$$\text{Rs. } 1.987 / 6.78 \times 10^{-4} = \text{Rs. } 2930.68$$

#### **Conclusion:**

- **Cost per gram of synthesized electrocatalyst:** Rs. 987.42
- **Cost per 50 mg of catalyst:** Rs. 49.37
- **Carbon cloth cost for electrode:** Rs. 45.00
- **Hydrogen production efficiency:** 90.035%
- **Estimated volume of H<sub>2</sub> produced at STP (for 1-hour electrolysis at 1 cm<sup>2</sup>):** 7.53 mL
- **Total cost of hydrogen production:** Rs. 1.987
- **Price per gram of generated hydrogen:** Rs. 2930.68

Although the above calculations deliver a general idea of lab-scale hydrogen production costs, it is vital to emphasize that material optimizations and large-scale synthesis could significantly improve economic viability. Our prime objective is not just cost estimation but to contribute to a sustainable future by producing green hydrogen. With its high energy density and zero carbon dioxide emission, hydrogen emerges as a promising alternative to fossil fuels. Thus, advancing electrocatalyst effectiveness and exploring cost-effective fabrication strategies will further strengthen hydrogen's role as a clean and sustainable energy source.
